# Supplementary material for: Comparative analysis of the Burkholderia cenocepacia K56-2 essential genome reveals cell envelope functions that are uniquely required for survival in species of the genus Burkholderia
Source: PubMed Central journal article supplement (PMC5729917; doi:10.1099/mgen.0.000140), 2017-11-21
Supplement: mgen-3-140-s001.pdf [file mgen-3-140-s001.pdf]

1 **Table S1. Bacterial strains and plasmids used in this study**

|                                       | <b>Features<sup>a</sup></b>                                                                                                                                                                                                  | <b>Source</b>                |
|---------------------------------------|------------------------------------------------------------------------------------------------------------------------------------------------------------------------------------------------------------------------------|------------------------------|
| <b>Strains</b>                        |                                                                                                                                                                                                                              |                              |
| <i>Burkholderia cenocepacia</i> K56-2 | ET12 lineage, CF isolate                                                                                                                                                                                                     | Darling et al. (1998)        |
| <i>Escherichia coli</i> SY327         | <i>araD</i> $\Delta$ ( <i>lac pro</i> ) <i>argE</i> (Am) <i>recA56</i><br>Rif <sup>r</sup> <i>nalA</i> $\lambda$ <i>pir</i>                                                                                                  | Miller and Mekalanos (1988)  |
| <i>E. coli</i> MM290                  | F <sup>+</sup> , $\phi$ 80 <i>lacZ</i> $\Delta$ M15 <i>endA1</i> <i>recA1</i><br><i>hsdR17</i> ( $r_H^+$ $m_K^+$ ) <i>supE44</i> <i>thi-1</i><br>$\Delta$ <i>gyrA96</i> ( $\Delta$ <i>lacZYA-argF</i> ) U169<br><i>relA1</i> | Bloodworth et al. (2013)     |
| <b>Plasmids</b>                       |                                                                                                                                                                                                                              |                              |
| pRK2013                               | <i>ori</i> <sub>colE1</sub> , RK2 derivative, Km <sup>r</sup> <i>mob</i> <sup>+</sup><br><i>tra</i> <sup>+</sup>                                                                                                             | Figurski and Helinski (1979) |
| pRBrhaBoutgfp                         | pSCRhaBoutgfp derivative<br>(Cardona et al. 2006), <i>ori</i> <sub>R6K</sub> , <i>rhaR</i><br><i>rhaS</i> <i>PrhaB</i> <i>e-gfp</i>                                                                                          | Bloodworth et al. (2013)     |

2 <sup>\*</sup>CF = cystic fibrosis, Km = kanamycin, Rif = rifampicin

3 **Table S2. Oligonucleotides used in this study**

| <b>Name</b> | <b>Sequence (5' - 3')*</b>                                                                            | <b>Description</b>                                              |
|-------------|-------------------------------------------------------------------------------------------------------|-----------------------------------------------------------------|
| 683         | CCGTAGTGAGTTCTTCGTCCGAGCCACTCGGAGATGTGTATAAGA<br>GACAGT                                               | Top strand adaptor (has<br>3' T overhang) for Tn-<br>seq circle |
| 684         | CTGTCTCTTATACACATCTCCGAGTGGCTCGGACGAAGAACTCACT<br>ACGG                                                | Bottom strand adaptor<br>for Tn-seq circle                      |
| 682         | CACAAGTGCGGCCGCACTAGTCTAGATTTAAATTACCGTAGTGAG<br>TTCTTCGTCCGAGCCAC                                    | Oligo probe for Tn-seq<br>circle                                |
| 690         | AATGATACGGCGACCACCGAGATCTACACTAGATCGCTCGTCGGC<br>AGCGTCAGATGTGTATAAGAGACAGNNNNAATCTAGACTAGTGCG<br>GCC | Illumina Index N501 Tn-<br>seq circle forward primer            |
| 681         | CAAGCAGAAGACGGCATAACGAGATTCGCCTTAGTCTCGTGGGCTC<br>GGAGATGTGTATAAGAGACAG                               | Nextera Index N701 Tn-<br>seq circle reverse primer             |

4 \*N is any nucleotide.

(a)

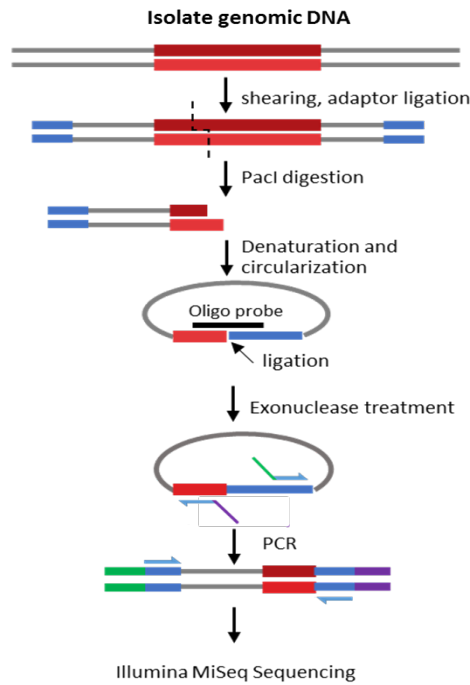

(b)

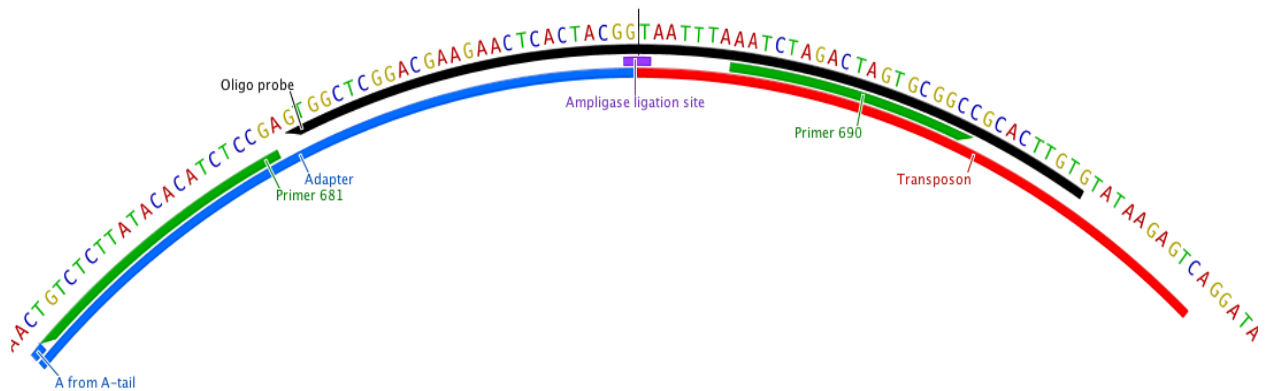

5

6 **Fig. S1. Enrichment of transposon-genome junctions with Tn-seq circle.**

7 A) Outline of the steps in Tn-seq circle. Adapters were ligated to genomic DNA that was sheared  
8 to an average size of 300 bp. Following PacI digestion, the DNA was denatured and annealed to  
9 an oligo probe. Only fragments containing the transposon and adapter sequences are circularized  
10 using the oligo probe. Exonuclease treatment degrades all linear DNA fragments, leaving behind  
11 fragments with the transposon-genome junction to be amplified by PCR prior to sequencing with  
12 Illumina MiSeq. Figure modified from Gallagher et al. (Gallagher, Shendure, & Manoil, 2011)  
13 B) Example of circularization of a transposon mutant. Adapter, (annealed 683 and 684, Table  
14 S2), blue; transposon sequence, red; ligation site, purple; oligo probe binding site, (682, Table  
15 S2), red; primer binding sites, (690 and 681, Table S2), green.

16

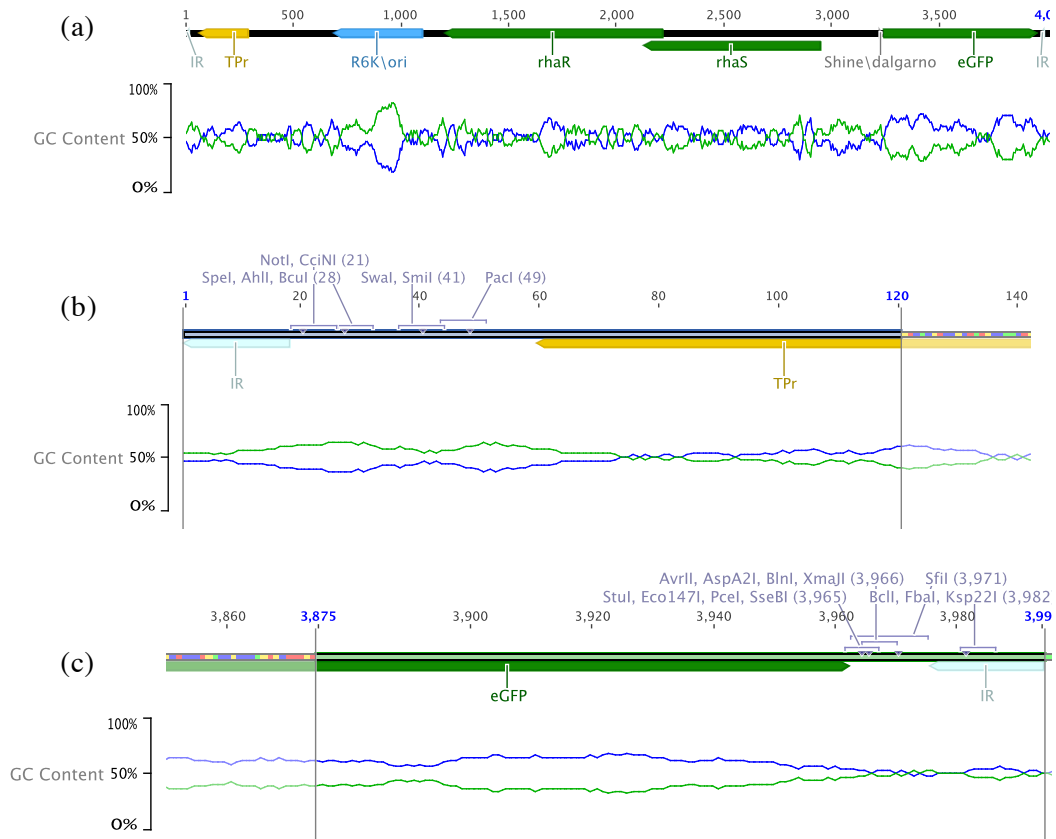

18

19 **Fig. S2. GC content of the transposon insertion sequence is low.**

20 A) The sequence of the transposon inserted into the genome, containing 51.3% GC content  
 21 overall. B) The 5' end of the transposon insertion sequence containing the *pacI* site. C) The 3'  
 22 end of the transposon insertion sequence containing the eGFP coding sequence located just  
 23 downstream of *PrhaB*. GC(blue)/AT(green) content is indicated below each sequence. Sites of  
 24 commercially available restriction enzymes that cut once within the insertion sequence are  
 25 indicated.

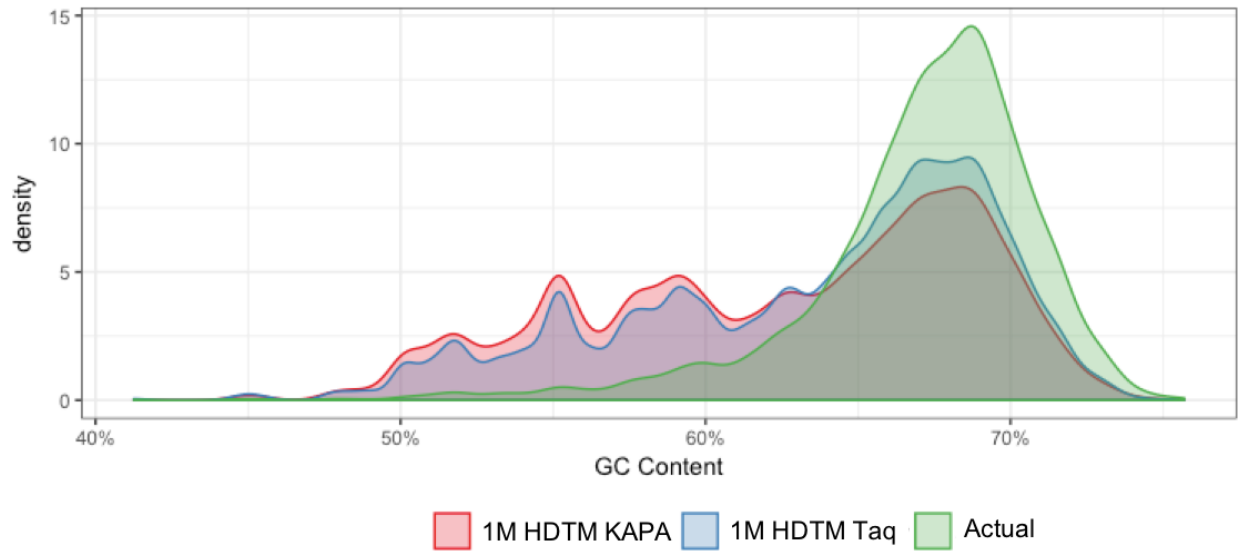

26

27 **Fig. S3. Distribution of insertion sites in the genome by GC content.**

28 A higher proportion of insertion sites in GC-rich regions were identified in the 1M HDTM Taq  
 29 library, compared to the 1M HDTM KAPA library. Density of insertions sites (Y-axis) in the  
 30 genome by GC content (number of insertion sites within a sliding window of 1 KB) scaled to a  
 31 maximum value of 15; X-axis, GC content. Insertion site density of 1M HDTM KAPA library  
 32 (pink) 1M HDTM Taq library (blue), actual GC content of the genome (green).

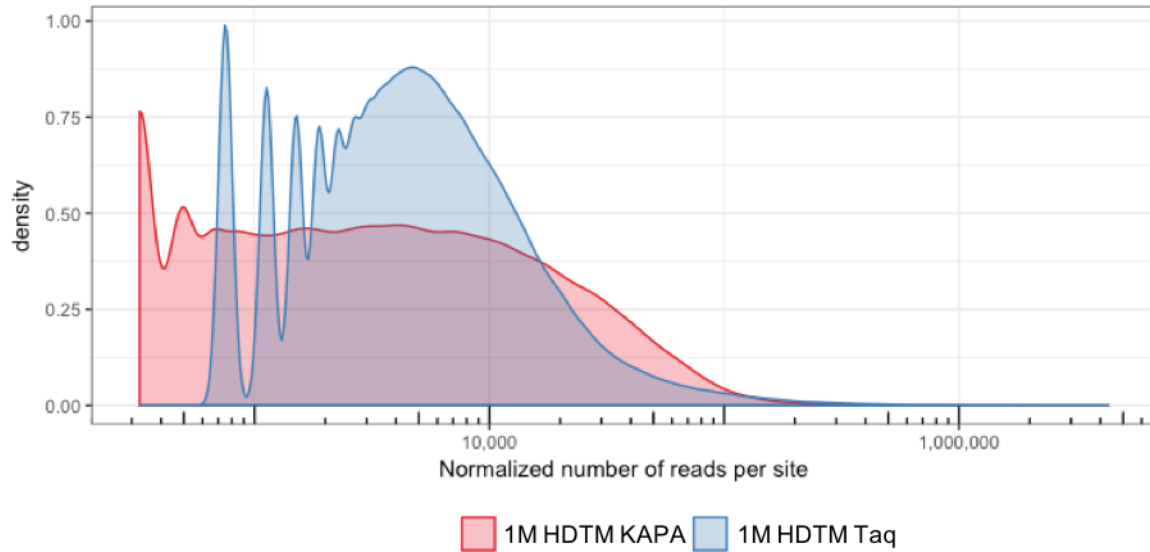

33

34 **Fig. S4. Distribution of reads per insertion site**

35 The frequency of reads per insertion site is shown for the HDTM libraries. The 1M HDTM  
 36 KAPA library has a more skewed distribution of reads per site than the 1M HDTM Taq library.  
 37 1M HDTM KAPA, pink; 1M HDTM Taq, blue; Y-axis, density of insertions sites scaled to a  
 38 maximum value of 1; X-axis, normalized number of reads per insertion site ( $1 \times 10^4$  x number of  
 39 reads per insertion site divided by the mean number of total reads).

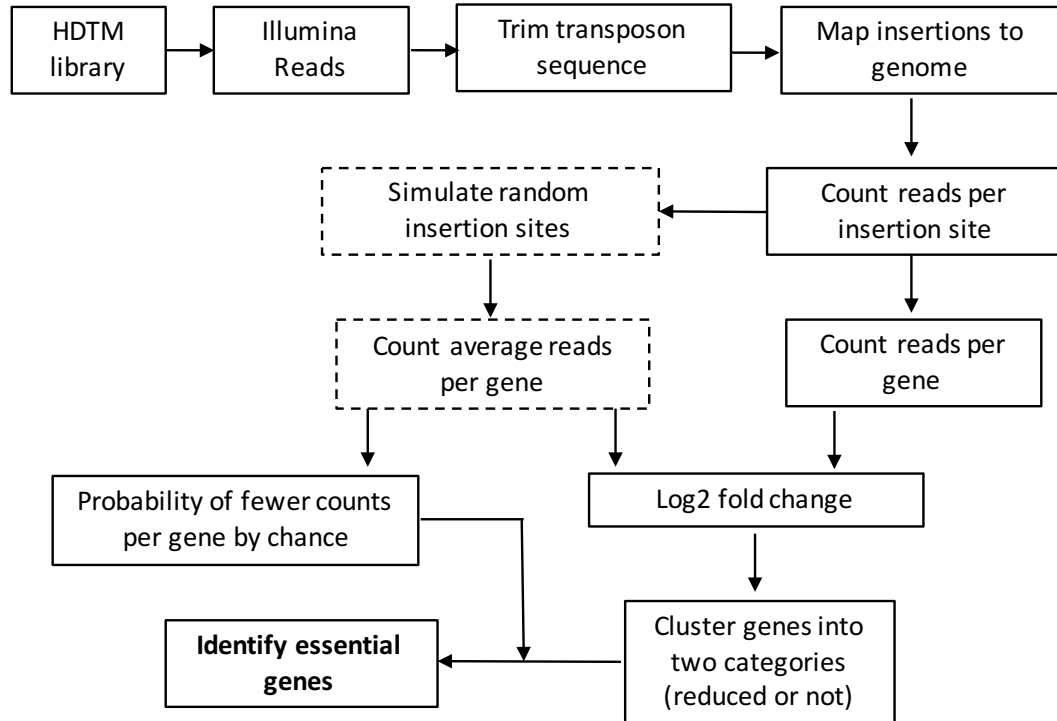

40

41 **Fig. S5. Bioinformatics pipeline to identify essential genes**

42 For the HDTM libraries, reads not containing a transposon sequence are discarded and the  
 43 sequence is trimmed from the remaining reads. The trimmed reads are mapped against the  
 44 reference genome using bowtie2 (Langmead, Trapnell, Pop, & Salzberg, 2009) and the position of  
 45 each insertion and the number of reads mapping to it are collected. To identify essential genes  
 46 using the HDTM library, the read counts are normalized to remove noise and position dependent  
 47 differences. Then, simulations are run randomly moving the insertions throughout the genome as  
 48 if there were no essential genes. For the experimental data and each simulated run, the number of  
 49 insertion reads per annotated gene is collected, where insertions into the first 10% of the 5' end  
 50 and last 10% of the 3' end of a gene are not considered disruptive. The log2 fold-change  
 51 (experimental/mean simulated reads per gene) is calculated, as well as the probability of seeing  
 52 fewer than the experimentally observed number of reads solely by chance.

## 1M HDTM KAPA

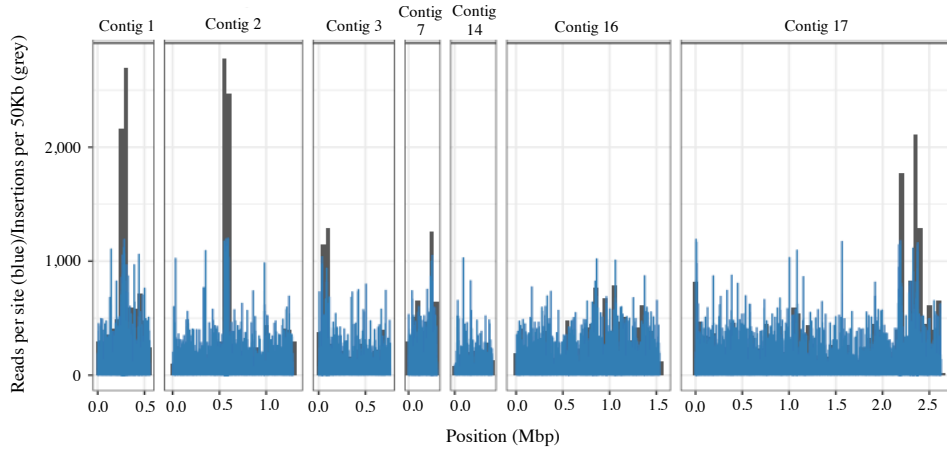

## 1M HDTM Taq

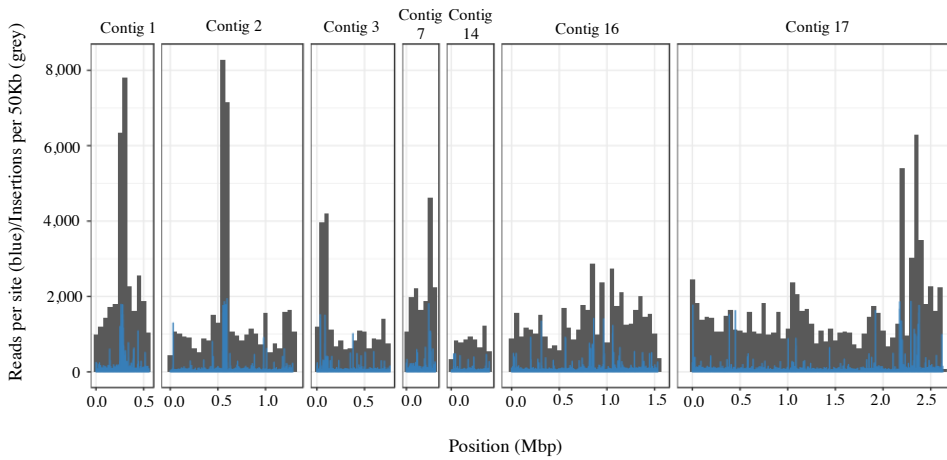

53

54

**Fig. S6. Positional effects of insertion site density and reads per insertion.**

55 The number of insertion sites (grey bars) mapping to the 7 largest contigs in a sliding window of  
56 50Kb is indicated after the removal of the 100 insertion sites with the highest read counts (Y-  
57 axis). The read count per insertion site for each library is overlaid (y-axis, blue bars). X-axis,  
58 basepair position in each contig, 1M HDTM KAPA library (top), 1M HDTM Taq library  
59 (bottom).



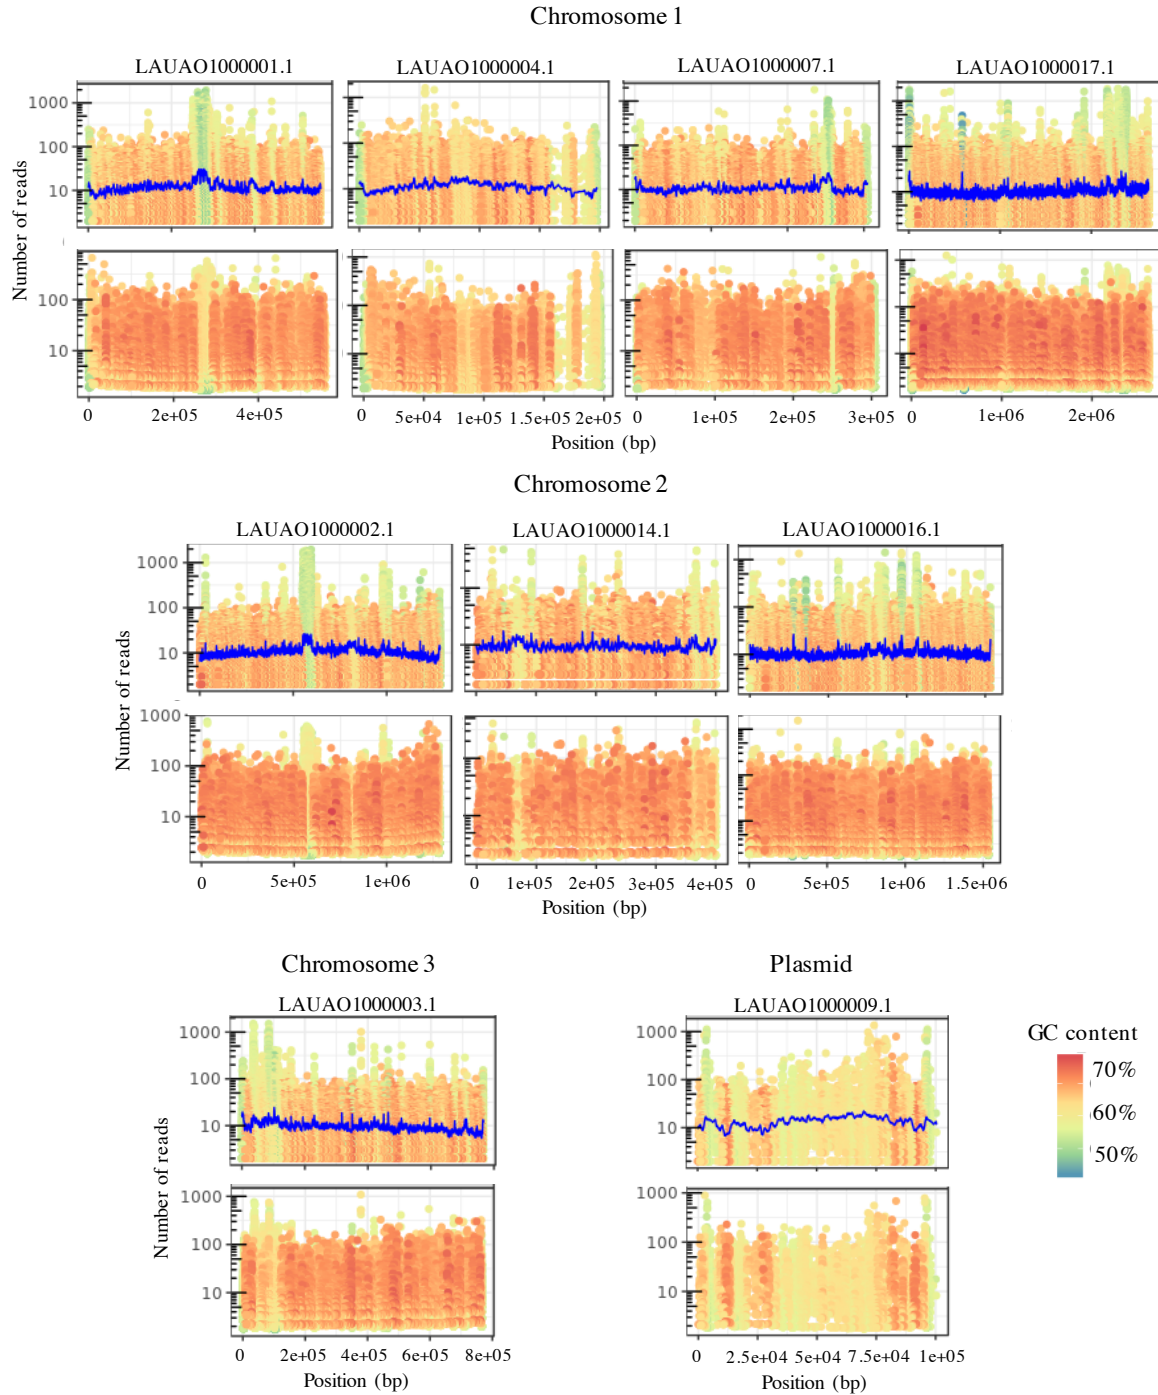

60  
61  
62  
63  
64  
65  
66  
67

**Fig. S7. Normalization of read counts from the 1M HDTM Taq library**  
Read counts mapping to each contig, arranged by replicon, and colour coded based on GC content (legend). Y-axis, number of reads, X-axis, base position in contig (bp). Top panels: Observed read counts for the contigs from each chromosome. The blue line represents the number of reads predicted from the model (read depth as a function of GC content and position along each contig). Bottom panels: Normalized read count after correction using the model prediction.
